# Supplementary material for: Discovery of the β-barrel–type RNA methyltransferase responsible for N6-methylation of N6-threonylcarbamoyladenosine in tRNAs
Source: PubMed Central journal article supplement (PMC4132733; doi:10.1093/nar/gku618), 2014-07-24
Supplement: supp_gku618_nar-01435-r-2014-File004.pdf [file supp_gku618_nar-01435-r-2014-File004.pdf]

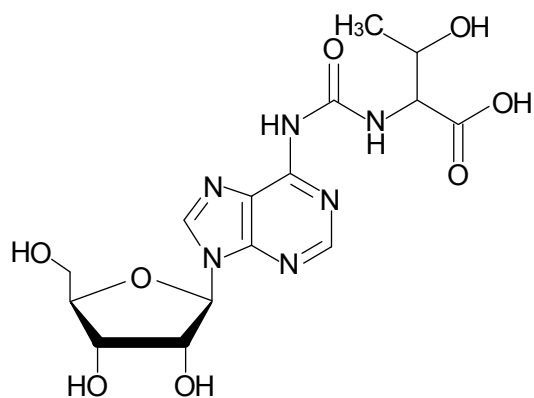

*N*<sup>6</sup>-threonylcarbamoyladenine (*t*<sup>6</sup>A)

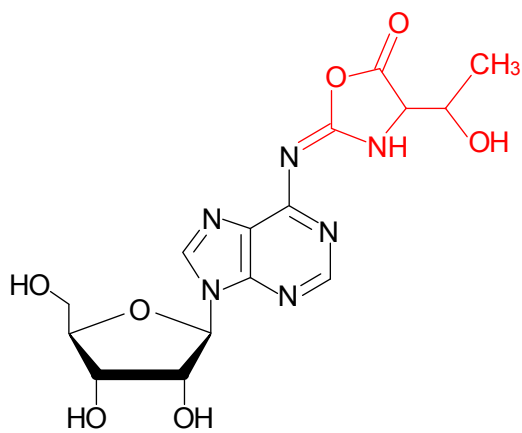

Cyclic-*N*<sup>6</sup>-threonylcarbamoyladenine (*ct*<sup>6</sup>A)

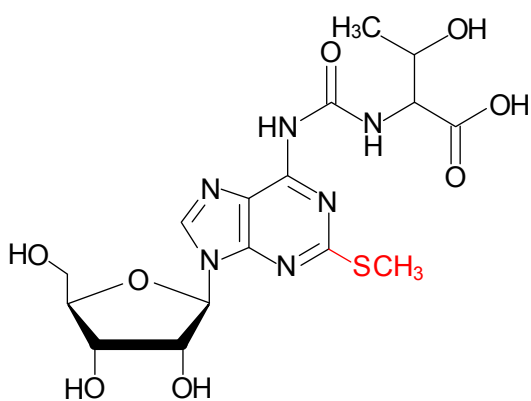

2-methylthio-*N*<sup>6</sup>-threonylcarbamoyladenine (*ms*<sup>2</sup>*t*<sup>6</sup>A)

Figure S1



A

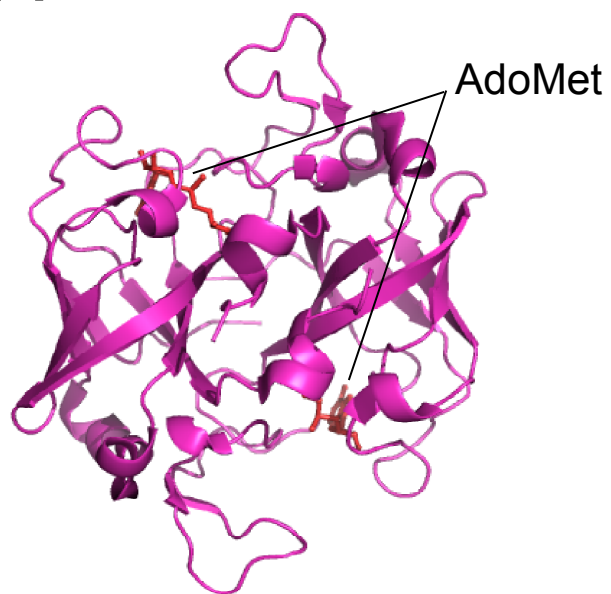

B

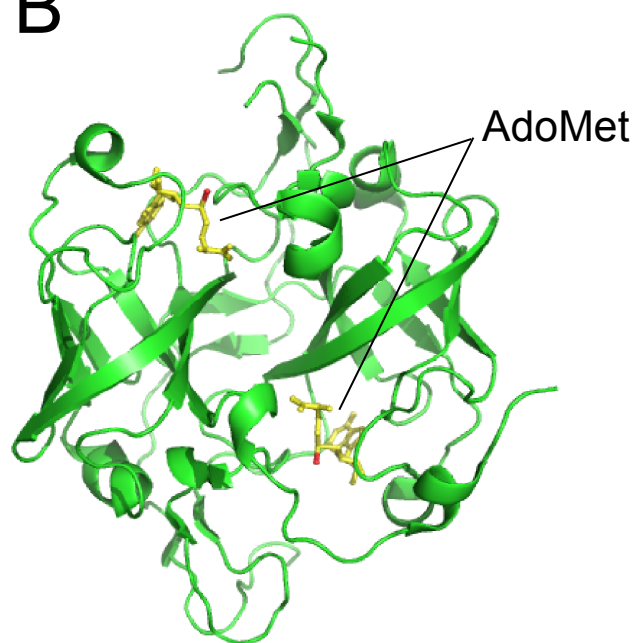

C

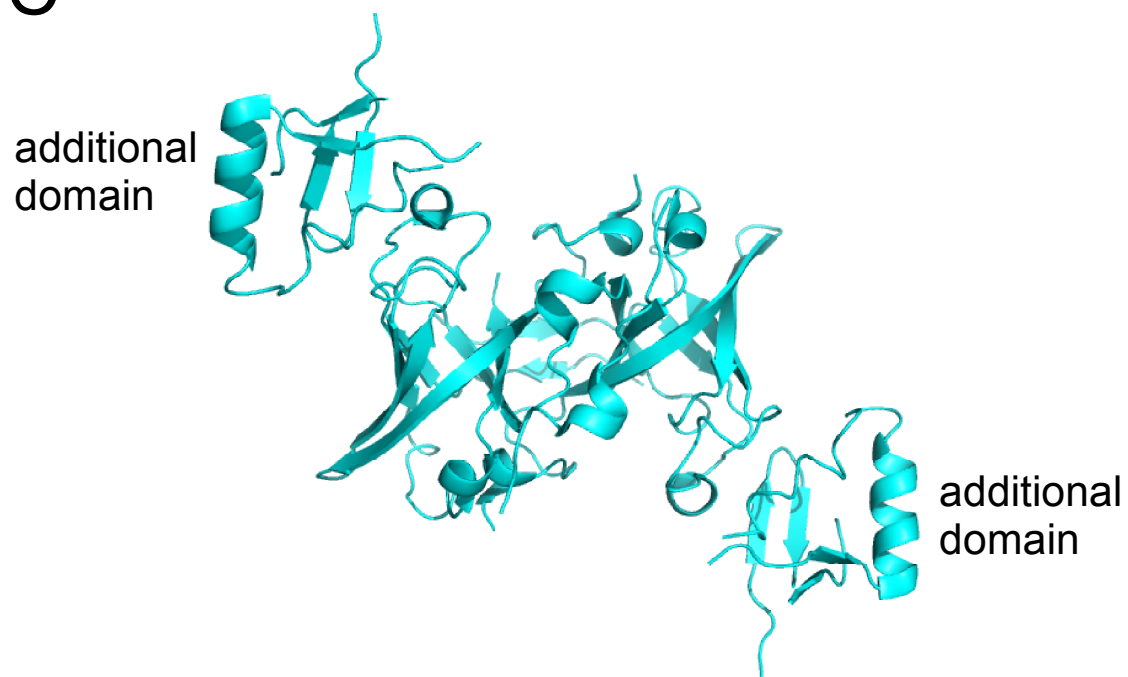

Figure S3

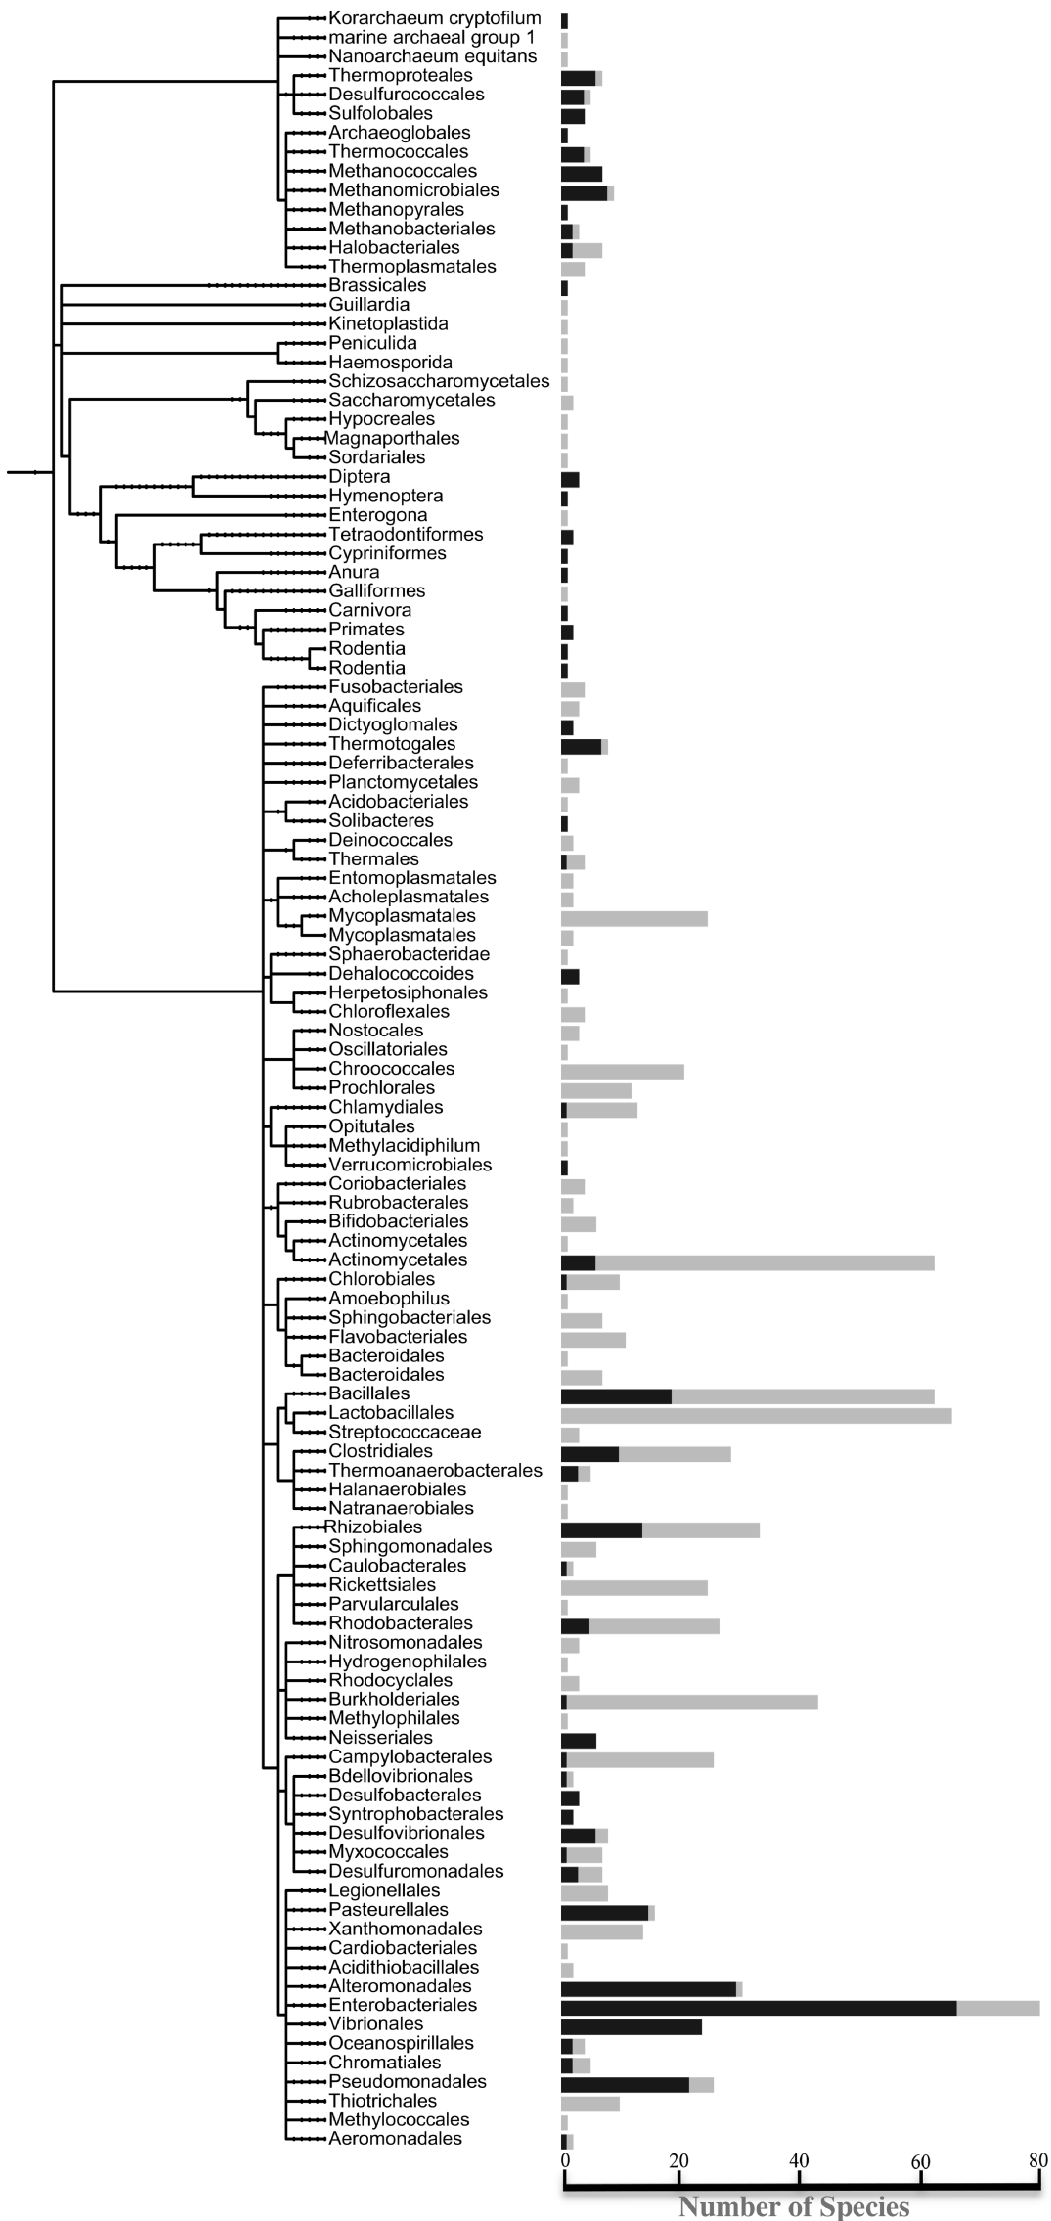

Figure S4

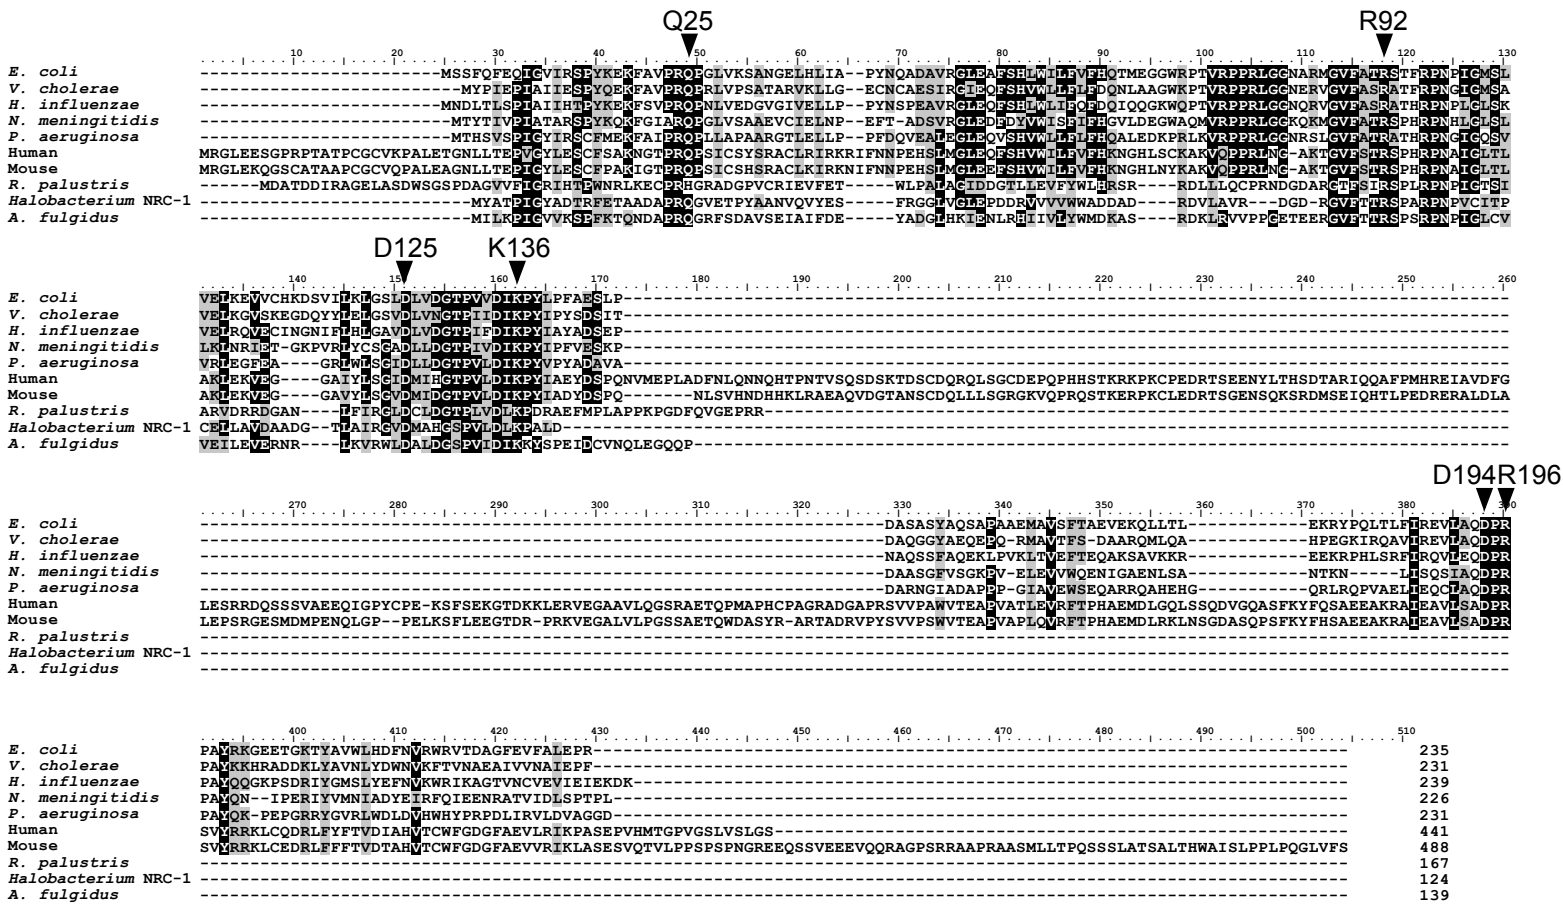

Figure S5

A

Human SETD7

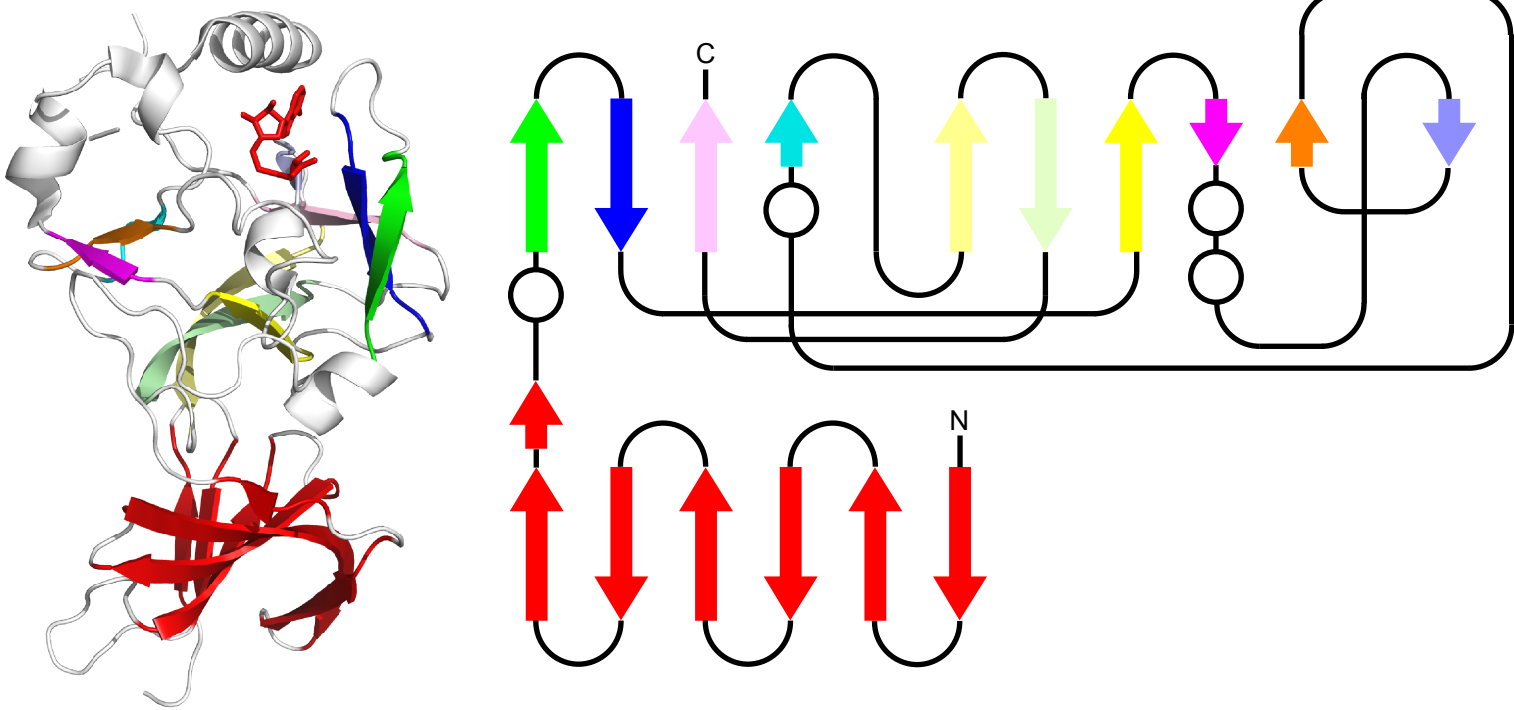

B

*A. fulgidus* YaeB (AF0241)

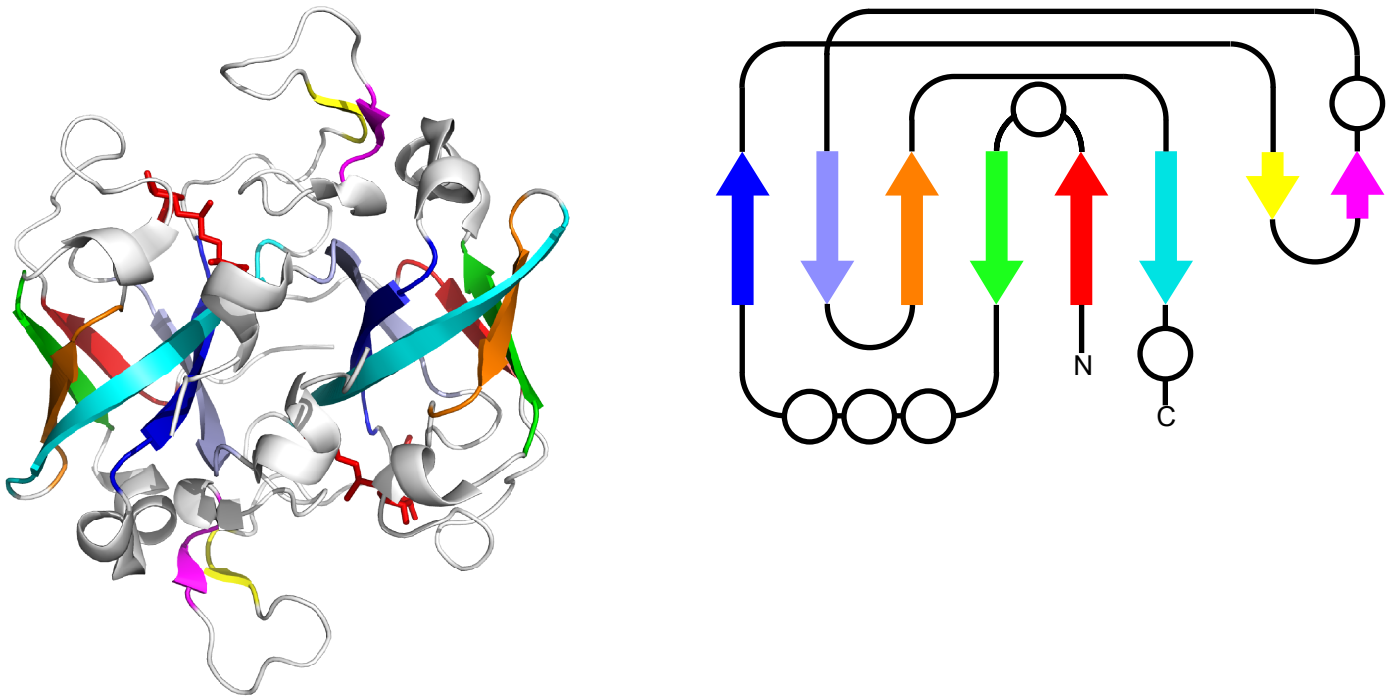

Figure S6

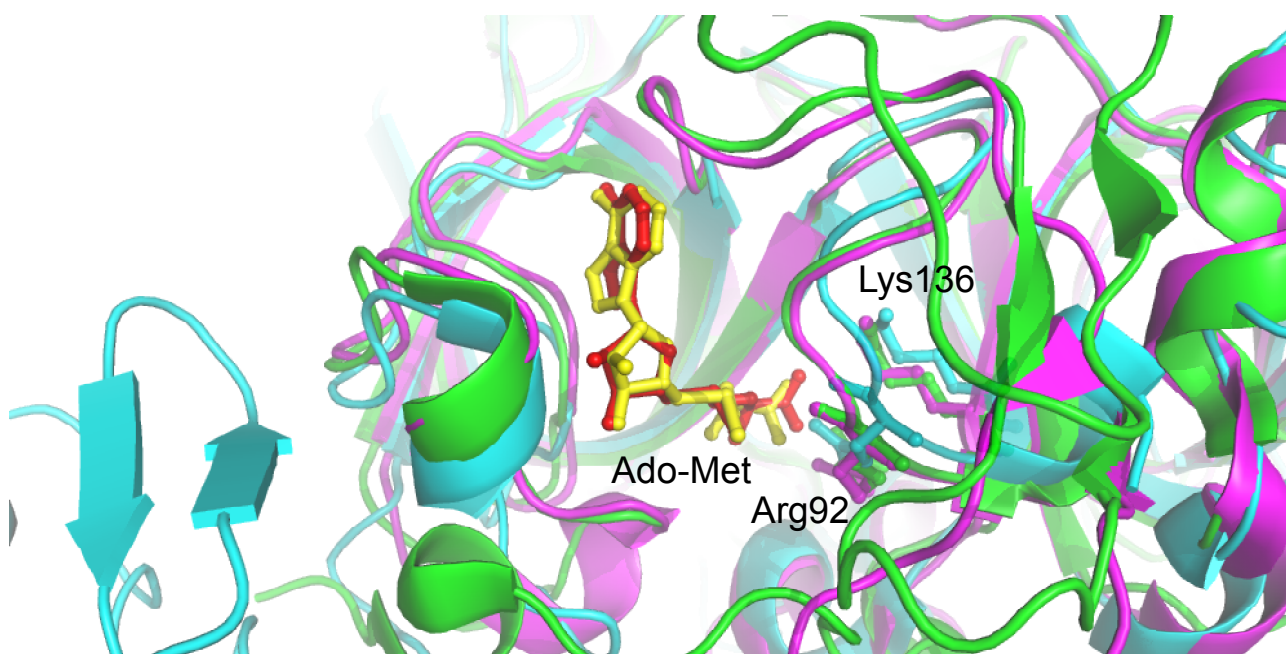

Figure S7





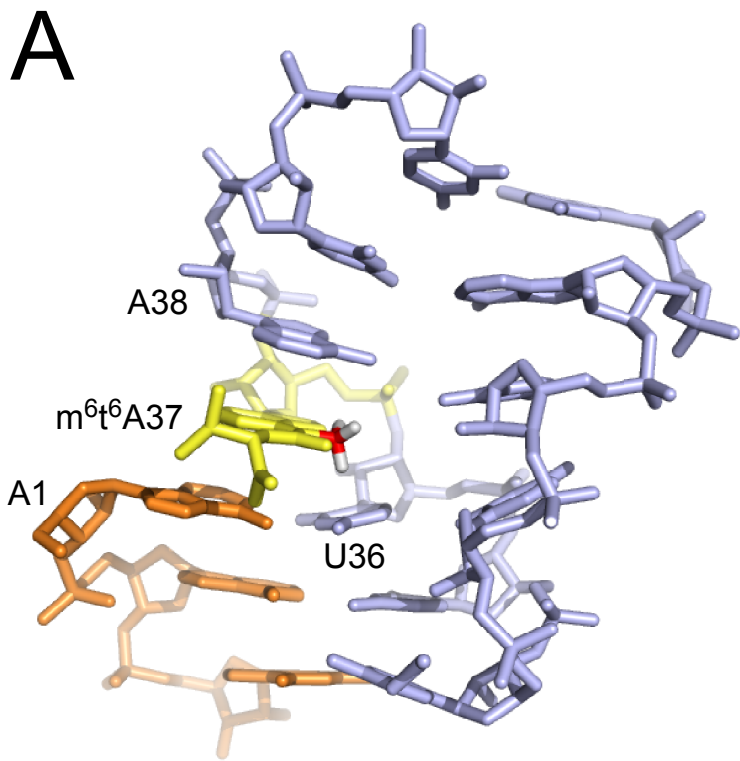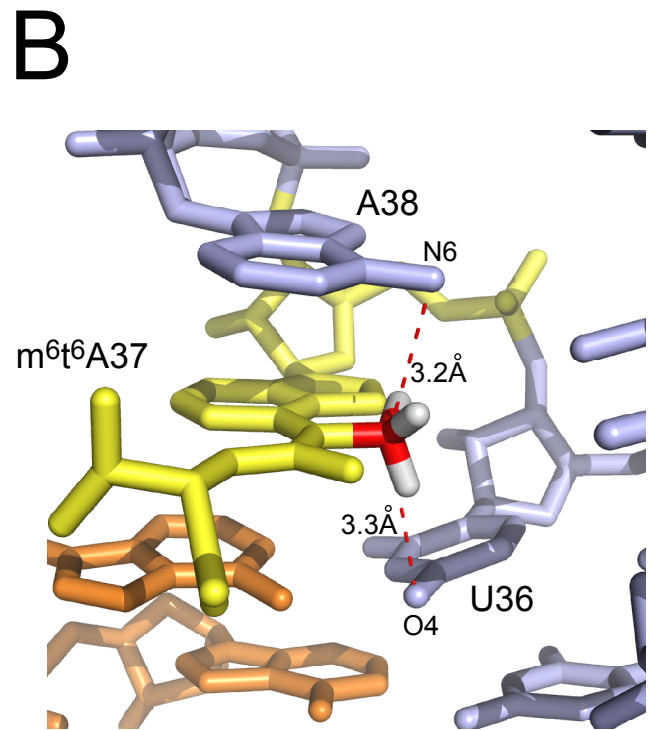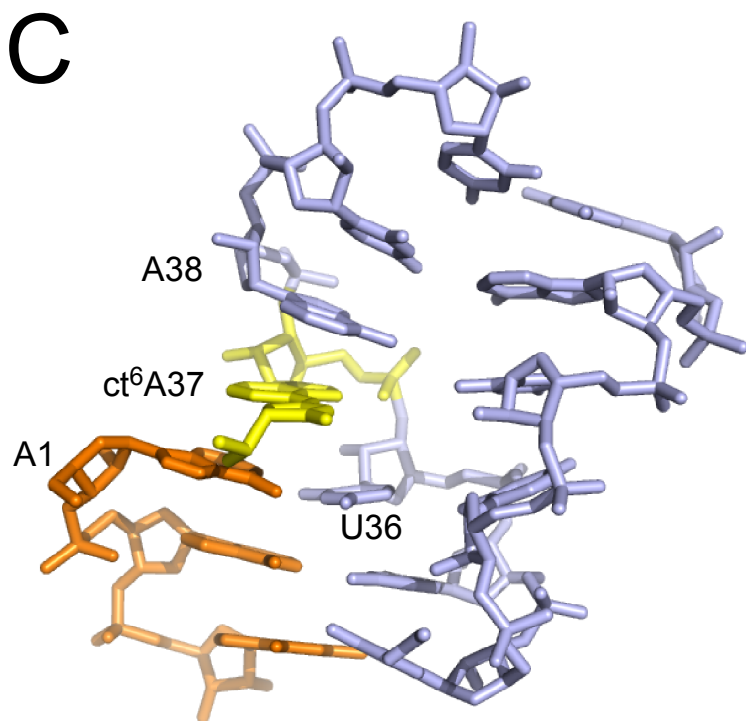

Figure S9
